# Supplementary material
Source: PubMed Central journal article supplement (PMC6177650)
Supplement: ba018929-suppl1.pdf [file ba018929-suppl1.pdf]

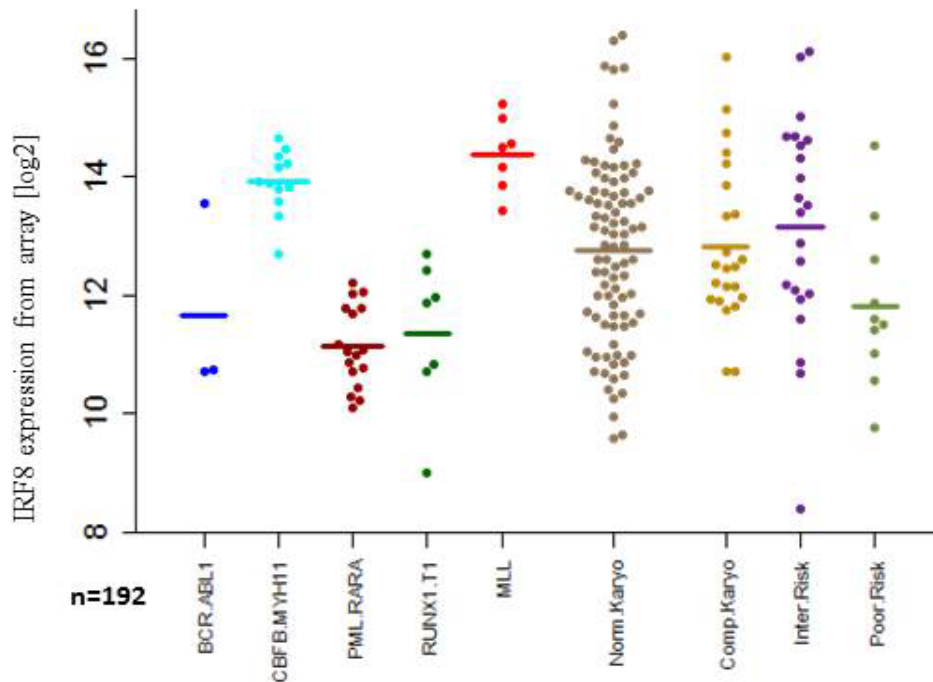

**Figure S1: IRF8 expression is significantly lower in the PML-RARA subtype compared to most other subtypes of AML patient samples from TCGA.** The log2 expression values of IRF8 from the Affymetrix Human Genome U133 Plus 2.0 Microarrays were shown as nine different AML subtypes: BCR-ABL1 (n=3); CBFB-MYH11 (n=12); PML/RARA (n=17); RUNX1-RUNX1T1 (n=7); MLL translocation (n=7); Normal Karyotype (n=91); Complex Cytogenetics (n=23); Intermediate Risk Cytogenetic Abnormality (n=22); Poor Risk Cytogenetic Abnormality (n=10). The AML patient microarray data were downloaded from TCGA website (<https://tcga-data.nci.nih.gov/tcga/dataAccessMatrix.htm>) and the patient annotation were downloaded from the cBioPortal website:

([http://www.cbioportal.org/study.do?cancer\\_study\\_id=laml\\_tcga\\_pub#clinical](http://www.cbioportal.org/study.do?cancer_study_id=laml_tcga_pub#clinical)).

IRF8 expression in human APL is lower than in the CBFB-MYH11, MLL translocation, Normal Karyotype, Complex Cytogenetics, and Intermediate Risk Cytogenetic Abnormality subtypes.

( $p < 0.0001$  for APL in comparison to each of these groups). Similar data on low expression of IRF8 in M3 AMLs has been described elsewhere <sup>16</sup>.

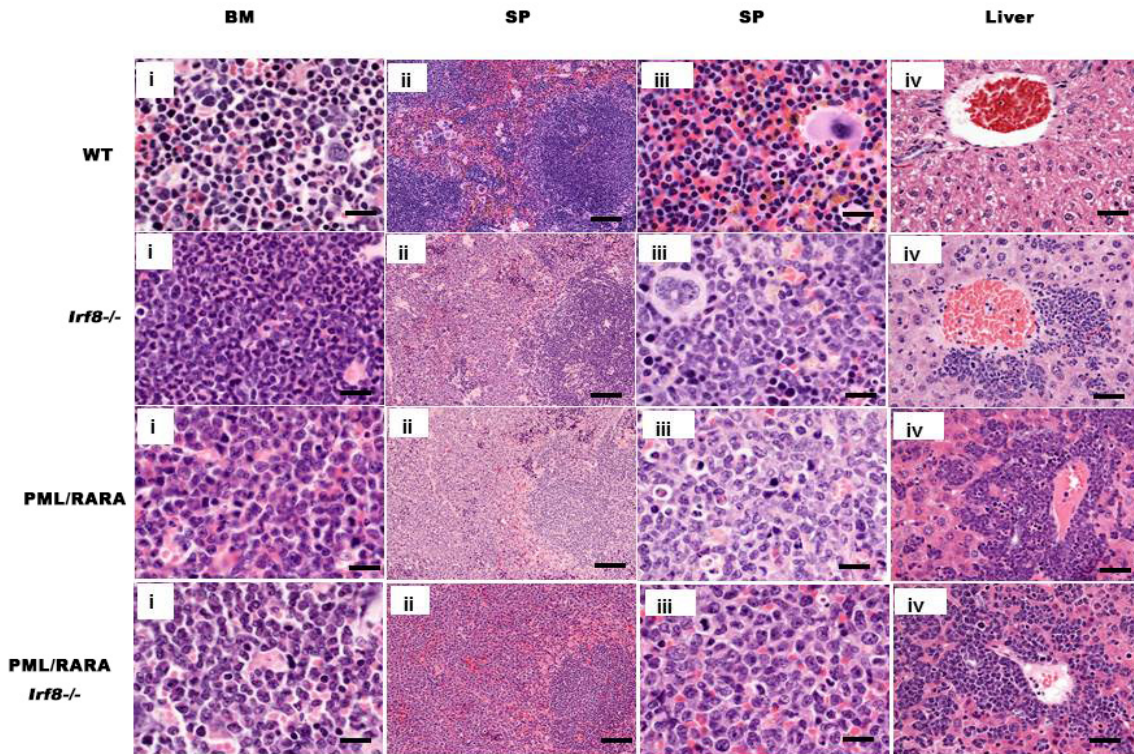

**Figure S2: Representative pathology of diseased *PML/RARA*, *Irf8*<sup>-/-</sup> and *PML/RARA Irf8*<sup>-/-</sup> mice in comparison with healthy wild-type mice. (i) bone marrow, (ii and iii) spleen, (iv) liver; size bars: (i and iii) 12 $\mu$ m (ii) 60 $\mu$ m (iv) 30 $\mu$ m; hematoxylin & eosin stain. Note the well differentiated expansion of myeloid cells in the *Irf8*<sup>-/-</sup> panels (MPN) in comparison to the numerous immature forms/blasts in the *PML/RARA* and *PML/RARA Irf8*<sup>-/-</sup> panels (AML).**

## **Supplemental Methods**

### ***Animal Protocol***

Mice were bred and maintained at University of California, San Francisco under specific pathogen free conditions and in accordance with the Institutional Animal Care and Use Committee guidelines.

### ***Western Blotting (methodological details)***

Sorted cells were resuspended in 25 $\mu$ l of protease inhibitor cocktail-containing RIPA buffer, incubated on ice and spun. SDS was added to the supernatant, and the solution heated at 95°C. Samples were run and transferred to a nitrocellulose membrane (Biorad#160-0146) and blocked (Li-Cor#927-40100). Mouse anti-ICSBP (Invitrogen#39-8800-1/500) was added and incubated overnight in blocking buffer (0.1%Tween-20). Following a wash, membrane was incubated with goat anti-mouse IRDye (LI-COR#926-32210-1/5,000) for 1h. Following 3 washes, membrane was imaged on a LI-COR scanner. To detect ACTIN, the same membrane was incubated with rabbit anti-actin (Sigma#2066-1/7,000) for 1h. Following a wash, membrane was incubated with goat anti-rabbit IRDye (LI-COR#926-32211-1/15,000) for 1h, and imaged as above.
